# Supplementary material for: Associations Between Added Sugar Intake and Risk of Four Different Cardiovascular Diseases in a Swedish Population-Based Prospective Cohort Study
Source: PubMed Central journal article supplement (PMC7786303; doi:10.3389/fnut.2020.603653), 2020-12-23
Supplement: Table_3.pdf [file Table_3.pdf]

**Supplemental table 3.** Associations between intake of added sugar, treats, toppings and sugar sweetened beverages and risk of incident coronary events for various covariate adjustment models.

| <b>Coronary events</b>         |                      | Basic model with lifestyle factors <sup>1</sup> | Basic model with lifestyle factors and BMI <sup>2</sup> | Main model with potential mediators <sup>3</sup> |
|--------------------------------|----------------------|-------------------------------------------------|---------------------------------------------------------|--------------------------------------------------|
| Intake                         | n/Cases/Person-years | HR (95% CI)                                     | HR (95% CI)                                             | HR (95% CI)                                      |
| <b>Added sugar</b>             |                      |                                                 |                                                         |                                                  |
| <5 E%                          | 2,354/216/45,758     | 1                                               | 1                                                       | 1                                                |
| 5-7.5 E%                       | 5,027/526/98,903     | 1.04 (0.88-1.22)                                | 1.04 (0.89-1.23)                                        | 1.03 (0.87-1.21)                                 |
| 7.5-10 E%                      | 6,709/712/132,271    | 1.01 (0.86-1.18)                                | 1.02 (0.88-1.21)                                        | 0.98 (0.84-1.15)                                 |
| 10-15 E%                       | 8,735/1,000/169,782  | 1.03 (0.89-1.20)                                | 1.06 (0.92-1.25)                                        | 1.00 (0.85-1.17)                                 |
| 15-20 E%                       | 2,377/271/45,356     | 0.97 (0.80-1.16)                                | 1.00 (0.83-1.20)                                        | 0.90 (0.74-1.09)                                 |
| >20 E%                         | 675/115/12,192       | 1.54 (1.22-1.94)                                | 1.58 (1.26-1.99)                                        | 1.36 (1.06-1.74)                                 |
| P-trend                        |                      | 0.18                                            | 0.02                                                    | 0.64                                             |
| <b>Treats, servings/week</b>   |                      |                                                 |                                                         |                                                  |
| ≤2                             | 2,931/338/55,191     | 1                                               | 1                                                       | 1                                                |
| >2-5                           | 7,161/764/140,332    | 0.97 (0.85-1.10)                                | 0.97 (0.85-1.10)                                        | 0.95 (0.83-1.08)                                 |
| >5-8                           | 6,775/724/133,183    | 0.94 (0.82-1.07)                                | 0.95 (0.83-1.08)                                        | 0.91 (0.79-1.04)                                 |
| >8-14                          | 6,687/728/131,00     | 0.86 (0.75-0.99)                                | 0.88 (0.76-1.00)                                        | 0.85 (0.74-0.97)                                 |
| >14                            | 2,323/286/44,553     | 0.95 (0.80-1.13)                                | 0.95 (0.80-1.13)                                        | 0.88 (0.74-1.05)                                 |
| P-trend                        |                      | 0.15                                            | 0.16                                                    | 0.02                                             |
| <b>Toppings, servings/week</b> |                      |                                                 |                                                         |                                                  |
| ≤2                             | 3,419/319/67,838     | 1                                               | 1                                                       | 1                                                |
| >2-7                           | 7,008/676/138,746    | 1.00 (0.87-1.14)                                | 1.01 (0.88-1.16)                                        | 0.96 (0.84-1.11)                                 |
| >7-14                          | 6,909/692/135,383    | 0.92 (0.80-1.05)                                | 0.94 (0.82-1.08)                                        | 0.91 (0.79-1.04)                                 |
| >14-28                         | 5,908/735/113,631    | 0.95 (0.83-1.09)                                | 0.99 (0.86-1.14)                                        | 0.92 (0.80-1.06)                                 |
| >28                            | 2,633/418/48,663     | 1.06 (0.90-1.25)                                | 1.12 (0.95-1.32)                                        | 1.01 (0.86-1.20)                                 |
| P-trend                        |                      | 0.23                                            | 0.06                                                    | 0.35                                             |
| <b>SSBs, servings/week</b>     |                      |                                                 |                                                         |                                                  |
| ≤1                             | 15,188/1,634/295,913 | 1                                               | 1                                                       | 1                                                |
| >1-3                           | 5,329/535/105,722    | 0.99 (0.90-1.09)                                | 0.99 (0.89-1.09)                                        | 0.96 (0.87-1.06)                                 |
| >3-5                           | 2,246/267/43,789     | 1.10 (0.97-1.25)                                | 1.09 (0.96-1.24)                                        | 1.02 (0.89-1.17)                                 |

|         |                  |                  |                  |                  |
|---------|------------------|------------------|------------------|------------------|
| >5-8    | 1,561/185/30,137 | 1.08 (0.93-1.26) | 1.07 (0.92-1.25) | 1.04 (0.89-1.21) |
| >8      | 1,553/219/28,700 | 1.20 (1.03-1.38) | 1.17 (1.01-1.36) | 1.09 (0.94-1.27) |
| P-trend |                  | 0.002            | 0.005            | 0.09             |

BMI: Body Mass Index. E%: Energy percentage. MET: Metabolic equivalent of task. HR: Hazard ratio. CI: Confidence interval. SSBs: Sugar-sweetened beverages.

<sup>1</sup> Adjusted for age, sex, season of dietary assessment, diet method, energy intake, smoking status, educational level, leisure-time physical activity and alcohol consumption.

<sup>2</sup> Adjusted for age, sex, season of dietary assessment, diet method, energy intake, smoking status, educational level, leisure-time physical activity, alcohol consumption and body mass index.

<sup>3</sup> Adjusted for age, sex, season of dietary assessment, diet method, energy intake, smoking status, educational level, leisure-time physical activity, alcohol consumption, body mass index and dietary habits including intake of processed meat, coffee, saturated fatty acids and fiber density, ApoB/ApoA-1, hypertension and lipid-lowering medication.

The associations were determined using multivariable Cox proportional hazards regression model and are expressed as HR with a 95% confidence interval and P-value for the linear trend.
