# Supplementary material for: Associations Between Added Sugar Intake and Risk of Four Different Cardiovascular Diseases in a Swedish Population-Based Prospective Cohort Study
Source: PubMed Central journal article supplement (PMC7786303; doi:10.3389/fnut.2020.603653), 2020-12-23
Supplement: Table_4.pdf [file Table_4.pdf]

**Supplemental table 4.** Associations between intake of added sugar, treats, toppings and sugar sweetened beverages and risk of incident atrial fibrillation for various covariate adjustment models.

| <b>Atrial fibrillation</b>     |                      | Basic model with lifestyle factors <sup>1</sup> | Basic model with lifestyle factors and BMI <sup>2</sup> | Main model with potential mediators <sup>3</sup> |
|--------------------------------|----------------------|-------------------------------------------------|---------------------------------------------------------|--------------------------------------------------|
| Intake                         | n/Cases/person-years | HR (95% CI)                                     | HR (95% CI)                                             | HR (95% CI)                                      |
| <b>Added sugar, E%</b>         |                      |                                                 |                                                         |                                                  |
| <5                             | 2,354/365/44,955     | 1                                               | 1                                                       | 1                                                |
| 5-7.5                          | 5,027/795/97,087     | 0.89 (0.79-1.01)                                | 0.91 (0.80-1.03)                                        | 0.93 (0.82-1.06)                                 |
| 7.5-10                         | 6,709/1,140/129,803  | 0.87 (0.79-1.00)                                | 0.91 (0.81-1.03)                                        | 0.92 (0.82-1.04)                                 |
| 10-15                          | 8,735/1,434/167,028  | 0.83 (0.74-0.94)                                | 0.86 (0.77-0.97)                                        | 0.88 (0.78-0.99)                                 |
| 15-20                          | 2,377/403/44,768     | 0.88 (0.76-1.01)                                | 0.92 (0.80-1.07)                                        | 0.93 (0.80-1.09)                                 |
| >20                            | 675/104/12,168       | 0.91 (0.73-1.14)                                | 0.94 (0.75-1.17)                                        | 0.91 (0.72-1.15)                                 |
| P-trend                        |                      | 0.20                                            | 0.59                                                    | 0.53                                             |
| <b>Treats, servings/week</b>   |                      |                                                 |                                                         |                                                  |
| ≤2                             | 2,931/459/54,387     | 1                                               | 1                                                       | 1                                                |
| >2-5                           | 7,161/1,152/137,977  | 0.97 (0.86-1.08)                                | 0.97 (0.87-1.08)                                        | 0.97 (0.86-1.08)                                 |
| >5-8                           | 6,775/1,083/131,129  | 0.89 (0.80-1.00)                                | 0.91 (0.81-1.01)                                        | 0.89 (0.79-1.00)                                 |
| >8-14                          | 6,687/1,149/128,388  | 0.88 (0.79-0.99)                                | 0.89 (0.80-1.00)                                        | 0.88 (0.78-0.99)                                 |
| >14                            | 2,323/398/43,930     | 0.89 (0.77-1.03)                                | 0.89 (0.77-1.03)                                        | 0.87 (0.75-1.02)                                 |
| P-trend                        |                      | 0.09                                            | 0.09                                                    | 0.05                                             |
| <b>Toppings, servings/week</b> |                      |                                                 |                                                         |                                                  |
| ≤2                             | 3,419/489/66,757     | 1                                               | 1                                                       | 1                                                |
| >2-7                           | 7,008/1,052/136,751  | 0.97 (0.87-1.08)                                | 0.98 (0.88-1.09)                                        | 0.97 (0.87-1.09)                                 |
| >7-14                          | 6,909/1,151/132,485  | 0.97 (0.87-1.08)                                | 1.00 (0.90-1.12)                                        | 1.00 (0.90-1.12)                                 |
| >14-28                         | 5,908/1,070/111,456  | 0.95 (0.85-1.06)                                | 1.01 (0.90-1.13)                                        | 1.00 (0.89-1.13)                                 |
| >28                            | 2,633/479/48,361     | 0.97 (0.85-1.12)                                | 1.05 (0.91-1.20)                                        | 1.05 (0.91-1.22)                                 |
| P-trend                        |                      | 0.71                                            | 0.44                                                    | 0.36                                             |
| <b>SSBs, servings/week</b>     |                      |                                                 |                                                         |                                                  |
| ≤1                             | 15,188/2,543/290,321 | 1                                               | 1                                                       | 1                                                |
| >1-3                           | 5,329/824/104,252    | 0.96 (0.89-1.04)                                | 0.95 (0.88-1.03)                                        | 0.95 (0.88-1.03)                                 |
| >3-5                           | 2,246/363/43,154     | 0.99 (0.88-1.04)                                | 0.97 (0.87-1.08)                                        | 0.98 (0.87-1.10)                                 |

|         |                  |                  |                  |                  |
|---------|------------------|------------------|------------------|------------------|
| >5-8    | 1,561/241/29,855 | 0.94 (0.82-1.08) | 0.93 (0.81-1.06) | 0.92 (0.80-1.05) |
| >8      | 1,553/270/28,228 | 1.08 (0.95-1.23) | 1.05 (0.92-1.20) | 1.04 (0.91-1.19) |
| P-trend |                  | 0.44             | 0.79             | 0.85             |

BMI: Body Mass Index. E%: Energy percentage. MET: Metabolic equivalent of task. HR: Hazard ratio. CI: Confidence interval. SSBs: Sugar-sweetened beverages.

<sup>1</sup> Adjusted for age, sex, season of dietary assessment, diet method, energy intake, smoking status, educational level, leisure-time physical activity and alcohol consumption.

<sup>2</sup> Adjusted for age, sex, season of dietary assessment, diet method, energy intake, smoking status, educational level, leisure-time physical activity, alcohol consumption and body mass index.

<sup>3</sup> Adjusted for age, sex, season of dietary assessment, diet method, energy intake, smoking status, educational level, leisure-time physical activity, alcohol consumption, body mass index and dietary habits including intake of processed meat, coffee, saturated fatty acids and fiber density, ApoB/ApoA-1, hypertension and lipid-lowering medication.

The associations were determined using multivariable Cox proportional hazards regression model and are expressed as HR with a 95% confidence interval and P-value for the linear trend.
