# Supplementary material for: Associations Between Added Sugar Intake and Risk of Four Different Cardiovascular Diseases in a Swedish Population-Based Prospective Cohort Study
Source: PubMed Central journal article supplement (PMC7786303; doi:10.3389/fnut.2020.603653), 2020-12-23
Supplement: Table_5.pdf [file Table_5.pdf]

**Supplemental table 5.** Associations between intake of added sugar, treats, toppings and sugar sweetened beverages and risk of incident aortic stenosis for various covariate adjustment models.

| <b>Aortic stenosis</b>         |                      | Basic model with<br>lifestyle factors <sup>1</sup> | Basic model with lifestyle<br>factors and BMI <sup>2</sup> | Main model with<br>potential mediators <sup>3</sup> |
|--------------------------------|----------------------|----------------------------------------------------|------------------------------------------------------------|-----------------------------------------------------|
| Intake                         | n/Cases/person-years | HR (95% CI)                                        | HR (95% CI)                                                | HR (95% CI)                                         |
| <b>Added sugar, E%</b>         |                      |                                                    |                                                            |                                                     |
| <5                             | 2,354/59/46,590      | 1                                                  | 1                                                          | 1                                                   |
| 5-7.5                          | 5,027/126/101,045    | 0.84 (0.62-1.15)                                   | 0.86 (0.63-1.18)                                           | 0.87 (0.63-1.20)                                    |
| 7.5-10                         | 6,709/161/135,715    | 0.74 (0.55-1.00)                                   | 0.77 (0.57-1.05)                                           | 0.78 (0.57-1.06)                                    |
| 10-15                          | 8,735/250/173,9587   | 0.87 (0.65-1.16)                                   | 0.92 (0.69-1.23)                                           | 0.90 (0.66-1.22)                                    |
| 15-20                          | 2,377/53/46,720      | 0.68 (0.47-1.00)                                   | 0.74 (0.50-1.07)                                           | 0.69 (0.46-1.02)                                    |
| >20                            | 675/20/12,632        | 1.05 (0.63-1.75)                                   | 1.09 (0.65-1.82)                                           | 0.89 (0.51-1.55)                                    |
| P-trend                        |                      | 0.52                                               | 0.74                                                       | 0.70                                                |
| <b>Treats, servings/week</b>   |                      |                                                    |                                                            |                                                     |
| ≤2                             | 2,931/74/56,470      | 1                                                  | 1                                                          | 1                                                   |
| >2-5                           | 7,161/183/143,543    | 0.92 (0.70-1.21)                                   | 0.93 (0.71-1.22)                                           | 0.90 (0.68-1.19)                                    |
| >5-8                           | 6,775/181/136,355    | 0.90 (0.68-1.19)                                   | 0.92 (0.69-1.21)                                           | 0.87 (0.66-1.16)                                    |
| >8-14                          | 6,687/171/134,249    | 0.77 (0.58-1.03)                                   | 0.79 (0.59-1.05)                                           | 0.76 (0.57-1.02)                                    |
| >14                            | 2,323/60/46,044      | 0.79 (0.55-1.15)                                   | 0.80 (0.55-1.15)                                           | 0.73 (0.49-1.06)                                    |
| P-trend                        |                      | 0.12                                               | 0.13                                                       | 0.05                                                |
| <b>Toppings, servings/week</b> |                      |                                                    |                                                            |                                                     |
| ≤2                             | 3,419/74/69,234      | 1                                                  | 1                                                          | 1                                                   |
| >2-7                           | 7,008/156/141,771    | 0.93 (0.71-1.24)                                   | 0.95 (0.72-1.26)                                           | 0.90 (0.68-1.20)                                    |
| >7-14                          | 6,909/187/138,010    | 1.03 (0.78-1.36)                                   | 1.09 (0.82-1.43)                                           | 1.08 (0.82-1.43)                                    |
| >14-28                         | 5,908/182/117,102    | 1.05 (0.79-1.40)                                   | 1.14 (0.86-1.52)                                           | 1.14 (0.85-1.53)                                    |
| >28                            | 2,633/70/50,543      | 0.96 (0.67-1.37)                                   | 1.07 (0.74-1.53)                                           | 1.01 (0.70-1.46)                                    |
| P-trend                        |                      | 0.87                                               | 0.62                                                       | 0.83                                                |
| <b>SSBs, servings/week</b>     |                      |                                                    |                                                            |                                                     |
| ≤1                             | 15,188/394/302,807   | 1                                                  | 1                                                          | 1                                                   |
| >1-3                           | 5,329/135/108,253    | 1.04 (0.85-1.26)                                   | 1.02 (0.84-1.24)                                           | 1.02 (0.83-1.24)                                    |
| >3-5                           | 2,246/55/45,008      | 0.96 (0.72-1.28)                                   | 0.94 (0.70-1.25)                                           | 0.91 (0.68-1.22)                                    |

|         |                 |                  |                  |                  |
|---------|-----------------|------------------|------------------|------------------|
| >5-8    | 1,561/40/31,046 | 1.04 (0.75-1.45) | 1.01 (0.73-1.41) | 1.01 (0.72-1.41) |
| >8      | 1,553/45/29,547 | 1.18 (0.86-1.62) | 1.13 (0.83-1.56) | 1.05 (0.75-1.47) |
| P-trend |                 | 0.57             | 0.79             | 0.92             |

BMI: Body Mass Index. E%: Energy percentage. MET: Metabolic equivalent of task. HR: Hazard ratio. CI: Confidence interval. SSBs: Sugar-sweetened beverages.

<sup>1</sup> Adjusted for age, sex, season of dietary assessment, diet method, energy intake, smoking status, educational level, leisure-time physical activity and alcohol consumption.

<sup>2</sup> Adjusted for age, sex, season of dietary assessment, diet method, energy intake, smoking status, educational level, leisure-time physical activity, alcohol consumption and body mass index.

<sup>3</sup> Adjusted for age, sex, season of dietary assessment, diet method, energy intake, smoking status, educational level, leisure-time physical activity, alcohol consumption, body mass index and dietary habits including intake of processed meat, coffee, saturated fatty acids and fiber density, ApoB/ApoA-1, hypertension and lipid-lowering medication.

The associations were determined using multivariable Cox proportional hazards regression model and are expressed as HR with a 95% confidence interval and P-value for the linear trend.
