# Supplementary material for: Associations Between Added Sugar Intake and Risk of Four Different Cardiovascular Diseases in a Swedish Population-Based Prospective Cohort Study
Source: PubMed Central journal article supplement (PMC7786303; doi:10.3389/fnut.2020.603653), 2020-12-23
Supplement: Table_6.pdf [file Table_6.pdf]

**Supplemental table 6.** Sensitivity analysis solely studying the first reported diagnosis for each participant, excluding incidence of the other diagnoses, and diabetes mellitus, prior to diagnosis of each of the studied outcome.

| Intake                         | Stroke               |                  | Coronary events      |                  | Atrial fibrillation  |                  | Aortic stenosis    |                  |
|--------------------------------|----------------------|------------------|----------------------|------------------|----------------------|------------------|--------------------|------------------|
|                                | n/Cases/PY           | HR (95% CI)      | n/Cases/PY           | HR (95% CI)      | n/Cases/PY           | HR (95% CI)      | n/Cases/PY         | HR (95% CI)      |
| <b>Added sugar, E%</b>         |                      |                  |                      |                  |                      |                  |                    |                  |
| <5                             | 2,292/158/44,438     | 1.19 (0.98-1.43) | 2,284/146/44,688     | 1                | 2,249/260/43,196     | 1                | 2,331/36/46,244    | 1                |
| 5-7.5                          | 4,882/314/96,756     | 1.00 (0.87-1.15) | 4,875/374/96,528     | 1.09 (0.90-1.33) | 4,792/560/93,233     | 0.90 (0.77-1.04) | 4,986/85/100,368   | 0.94 (0.63-2.40) |
| 7.5-10                         | 6,500/456/129,239    | 1.02 (0.90-1.15) | 6,499/502/128,845    | 1.06 (0.87-1.28) | 6381/812/124,527     | 0.90 (0.78-1.04) | 6,651/103/134,686  | 0.77 (0.52-1.15) |
| 10-15                          | 8,455/616/165,858    | 1                | 8,433/698/165,236    | 1.05 (0.87-1.26) | 8,309/1,008/16,0312  | 0.84 (0.72-0.97) | 8,635/150/172,355  | 0.86 (0.58-1.26) |
| 15-20                          | 2,307/181/44,372     | 1.06 (0.90-1.26) | 2,307/201/44,228     | 1.01 (0.80-1.26) | 2,267/293/42,948     | 0.93 (0.77-1.11) | 2,356/32/46,342    | 0.68 (0.41-1.13) |
| >20                            | 650/64/11,714        | 1.38 (1.05-1.81) | 633/73/11,600        | 1.37 (1.01-1.85) | 640/69/11,606        | 0.88 (0.67-1.16) | 667/12/12,484      | 0.99 (0.49-1.97) |
| P-trend                        |                      | -                |                      | 0.61             |                      | 0.37             |                    | 0.66             |
| <b>Treats, servings/week</b>   |                      |                  |                      |                  |                      |                  |                    |                  |
| ≤2                             | 2,844/206/53,758     | 1                | 2,828/235/53,614     | 1                | 2,791/319/52,082     | 1                | 2,902/45/55,992    | 1                |
| >2-5                           | 6,955/479/137,175    | 0.91 (0.77-1.08) | 6,937/540/136,831    | 1.01 (0.86-1.18) | 6,815/806/132,336    | 0.95 (0.84-1.09) | 7,093/115/142,400  | 0.94 (0.66-1.34) |
| >5-8                           | 6,562/459/129,905    | 0.87 (0.73-1.03) | 6,560/509/129,850    | 0.97 (0.82-1.13) | 6,447/755/125,930    | 0.88 (0.77-1.00) | 6,706/112/135,258  | 0.89 (0.62-1.27) |
| >8-14                          | 6,479/472/127,939    | 0.83 (0.70-0.99) | 6,471/512/127,570    | 0.89 (0.75-1.04) | 6,362/824/123,115    | 0.90 (0.78-1.03) | 6,627/111/133,196  | 0.80 (0.55-1.16) |
| >14                            | 2,246/173/43,601     | 0.84 (0.67-1.06) | 2,235/198/43,260     | 0.94 (0.76-1.16) | 2,223/298/42,359     | 0.95 (0.79-1.13) | 2,298/35/4,5633    | 0.73 (0.45-1.18) |
| P-trend                        |                      | 0.12             |                      | 0.09             |                      | 0.45             |                    | 0.16             |
| <b>Toppings, servings/week</b> |                      |                  |                      |                  |                      |                  |                    |                  |
| ≤2                             | 3,319/180/66,328     | 1                | 3,319/219/66,283     | 1                | 3,272/342/64,382     | 1                | 3,385/40/68,685    | 1                |
| >2-7                           | 6,817/439/135,667    | 1.08 (0.91-1.29) | 6,786/454/135,282    | 0.99 (0.84-1.17) | 6,708/752/131,800    | 0.98 (0.86-1.12) | 6,958/106/140,905  | 1.22 (0.84-1.76) |
| >7-14                          | 6,705/471/131,948    | 1.09 (0.91-1.30) | 6,711/494/132,230    | 0.96 (0.81-1.13) | 6,603/845/127,577    | 1.03 (0.90-1.17) | 6,843/121/136,909  | 1.30 (0.90-1.89) |
| >14-28                         | 5,698/467/110,833    | 1.17 (0.97-1.41) | 5,702/529/110,508    | 0.99 (0.84-1.17) | 5,587/749/106,407    | 1.00 (0.87-1.14) | 5,834/108/115,881  | 1.31 (0.88-1.94) |
| >28                            | 2,547/232/47,601     | 1.28 (1.02-1.60) | 2,513/298/46,823     | 1.07 (0.88-1.30) | 2,468/314/45,656     | 1.00 (0.85-1.19) | 2,606/43/50,100    | 1.25 (0.77-2.02) |
| P-trend                        |                      | 0.11             |                      | 0.32             |                      | 0.99             |                    | 0.80             |
| <b>SSBs, servings/week</b>     |                      |                  |                      |                  |                      |                  |                    |                  |
| ≤1                             | 14,716/1,035/288,745 | 1                | 14,704/1,150/288,292 | 1                | 14,480/1,835/279,047 | 1                | 15,043/249/300,474 | 1                |
| >1-3                           | 5,188/353/103,743    | 1.03 (0.91-1.16) | 5,180/386/103,402    | 0.98 (0.87-1.10) | 5,085/580/100,242    | 0.93 (0.85-1.02) | 5,279/85/107,378   | 1.03 (0.80-1.33) |
| >3-5                           | 2,180/164/42,821     | 1.09 (0.92-1.29) | 2,164/185/42,487     | 1.04 (0.89-1.22) | 2,125/242/41,193     | 0.90 (0.79-1.03) | 2,228/37/44,706    | 1.01 (0.71-1.45) |
| >5-8                           | 1,512/110/29,433     | 1.06 (0.86-1.29) | 1,503/127/29,290     | 0.99 (0.82-1.19) | 1,482/162/28,565     | 0.87 (0.74-1.03) | 1,545/24/30,751    | 1.01 (0.66-1.55) |
| >8                             | 1,490/127/27,634     | 1.18 (0.97-1.44) | 1,480/146/27,655     | 1.03 (0.86-1.24) | 1,466/183/26,775     | 1.01 (0.86-1.19) | 1,531/23/29,171    | 0.98 (0.62-1.52) |

P-trend

0.01

0.72

0.66

0.77

---

E%: Energy percentage. PY: Person-years. HR: Hazard ratio. SSBs: Sugar-sweetened beverages.

The associations were determined using multivariable Cox proportional hazards regression model and are expressed as HR with a 95% confidence interval and P-value for the linear trend. All analyses were carried out with adjustment for age, sex, season of dietary assessment, diet method, energy intake, smoking status, educational level, leisure-time physical activity, alcohol consumption, body mass index and dietary habits including intake of processed meat, coffee, saturated fatty acids and fiber density.
